# Supplementary material for: Sedative Properties of Dexmedetomidine Are Mediated Independently from Native Thalamic Hyperpolarization-Activated Cyclic Nucleotide-Gated Channel Function at Clinically Relevant Concentrations
Source: MDPI journal article supplement (doi:10.3390/ijms24010519), 2022-12-28
Supplement: s1 [file s1]

## Supplementary Material

### Sedative properties of dexmedetomidine are mediated independently from native mice thalamic hyperpolarization-activated, cyclic nucleotide gated channel function at clinically relevant concentrations

**Supplementary Table S1.** Effects of dexmedetomidine on the resting membrane potential at different concentration groups (absolute values) after 30 minutes and 45 minutes of DEX wash in. There were no significant differences between control, 30 minutes, and 45 minutes of DEX (1, 10, and 100  $\mu$ M) exposure on the resting membrane potential. For multiple comparisons of repeated measures, Friedman test was used.

| resting membrane potential [mV] |         |                 |            |                 |            |                 |    |       |
|---------------------------------|---------|-----------------|------------|-----------------|------------|-----------------|----|-------|
| DEX [ $\mu$ M]                  | control |                 | DEX 30 min |                 | DEX 45 min |                 | n  | p     |
|                                 | Median  | IQR             | Median     | IQR             | Median     | IQR             |    |       |
| 1                               | -58.55  | -61.12 – -55.77 | -60.03     | -62.78 – -58.41 | -58.85     | -61.86 – -56.85 | 11 | 0.219 |
| 10                              | -58.17  | -60.23 – -57.13 | -58.04     | -61.44 – -56.14 | -57.60     | -61.25 – -56.17 | 10 | 0.368 |
| 100                             | -57.48  | -58.47 – -56.91 | -58.54     | -60.5 – -56.97  | -58.73     | -59.68 – -57.11 | 10 | 0.067 |

**Supplementary Table S2.** Effects of dexmedetomidine (45 minutes) on the resting membrane potential at different concentration groups (absolute values). Wilcoxon-matched pairs signed rank test for statistical comparisons.

| resting membrane potential [mV] |         |                 |        |                 |    |       |
|---------------------------------|---------|-----------------|--------|-----------------|----|-------|
| DEX [ $\mu$ M]                  | control |                 | DEX    |                 | n  | p     |
|                                 | Median  | IQR             | Median | IQR             |    |       |
| 1                               | -58.55  | -61.12 – -55.77 | -58.85 | -61.86 – -56.85 | 11 | 0.465 |
| 10                              | -58.17  | -60.23 – -57.13 | -57.60 | -61.25 – -56.17 | 10 | 0.846 |
| 100                             | -57.48  | -58.47 – -56.91 | -58.73 | -59.68 – -57.11 | 10 | 0.106 |

**Supplementary Table S3.** Effects of dexmedetomidine (45 minutes) on the input resistance at different concentration groups (absolute values). Wilcoxon-matched pairs signed rank test for statistical comparisons.

| DEX [ $\mu$ M] | input resistance [M $\Omega$ ] |             |        |             | n  | <i>p</i> |
|----------------|--------------------------------|-------------|--------|-------------|----|----------|
|                | control                        |             | DEX    |             |    |          |
|                | Median                         | IQR         | Median | IQR         |    |          |
| 1              | 290.3                          | 235.4–343.4 | 317.4  | 260.8–337.8 | 11 | 0.044    |
| 10             | 362.7                          | 311.5–386.3 | 393.1  | 362.5–420.7 | 10 | 0.006    |
| 100            | 339.4                          | 261.9–413.9 | 424.5  | 369.1–493.3 | 10 | 0.002    |

**Supplementary Table S4.** Effects of dexmedetomidine (45 minutes) on the action potential threshold at different concentration groups (absolute values). Wilcoxon-matched pairs signed rank test for statistical comparisons.

| DEX [ $\mu$ M] | action potential threshold [mV] |                 |        |                  | n  | <i>p</i> |
|----------------|---------------------------------|-----------------|--------|------------------|----|----------|
|                | control                         |                 | DEX    |                  |    |          |
|                | Median                          | IQR             | Median | IQR              |    |          |
| 1              | −38.22                          | −39.98 – −37.45 | −40.28 | −41.69 – −36.84  | 11 | 0.102    |
| 10             | −38.64                          | −39.50 – −36.49 | −39.38 | −41.16 – −37.55) | 10 | 0.232    |
| 100            | −39.80                          | −40.97 – −39.27 | −38.16 | −38.98 – −33.25  | 10 | 0.002    |

**Supplementary Table S5.** Effects of dexmedetomidine (45 minutes) on the action potential at different concentration groups (absolute values). Wilcoxon-matched pairs signed rank test for statistical comparisons.

| DEX [μM] | action potential frequency [Hz] |             |        |             | n  | <i>p</i> |
|----------|---------------------------------|-------------|--------|-------------|----|----------|
|          | control                         |             | DEX    |             |    |          |
|          | Median                          | IQR         | Median | IQR         |    |          |
| 1        | 39.67                           | 36.46–39.84 | 41.96  | 36.59–45.19 | 11 | 0.054    |
| 10       | 42.48                           | 34.56–45.57 | 41.26  | 35.01–46.52 | 10 | >0.999   |
| 100      | 42.08                           | 39.75–45.30 | 27.44  | 21.61–33.66 | 10 | 0.002    |

**Supplementary Table S6.** Effects of dexmedetomidine (45 minutes) on  $I_{h \text{ maximal}}$  (recorded at -133 mV) at different concentration groups (absolute values). Wilcoxon-matched pairs signed rank test for statistical comparisons.

| DEX [μM] | I <sub>h</sub> maximal [pA] |         |        |         | n  | <i>p</i> |
|----------|-----------------------------|---------|--------|---------|----|----------|
|          | control                     |         | DEX    |         |    |          |
|          | Median                      | IQR     | Median | IQR     |    |          |
| 1        | 516                         | 479–983 | 495    | 378–838 | 11 | 0.042    |
| 10       | 534                         | 321–719 | 434    | 305–663 | 10 | 0.006    |
| 100      | 605                         | 418–860 | 429    | 321–500 | 10 | 0.004    |

**Supplementary Table S7.** Effects of dexmedetomidine (45 minutes) on the half-maximal activation potential of HCN channels at different concentration groups (absolute values). Wilcoxon-matched pairs signed rank test for statistical comparisons.

| half-maximal activation potential [mV] |         |                 |        |                 |    |          |
|----------------------------------------|---------|-----------------|--------|-----------------|----|----------|
| DEX [ $\mu$ M]                         | control |                 | DEX    |                 | n  | <i>p</i> |
|                                        | Median  | IQR             | Median | IQR             |    |          |
| 1                                      | -86.23  | -87.32 – -84.81 | -86.64 | -87.63 – -84.65 | 11 | 0.898    |
| 10                                     | -87.42  | -88.70 – -86.22 | -86.89 | -88.47 – -85.29 | 10 | 0.695    |
| 100                                    | -85.88  | -88.15 – -83.99 | -91.54 | -93.22 – -88.07 | 10 | 0.004    |

**Supplementary Table S8.** Effects of dexmedetomidine (45 minutes) on the HCN activation time constant  $\tau_{\text{fast}}$  at different concentration groups (absolute values). Wilcoxon-matched pairs signed rank test for statistical comparisons.

| $\tau_{\text{fast}}$ [ms] |         |             |        |             |    |          |
|---------------------------|---------|-------------|--------|-------------|----|----------|
| DEX [ $\mu$ M]            | control |             | DEX    |             | n  | <i>p</i> |
|                           | Median  | IQR         | Median | IQR         |    |          |
| 1                         | 217.5   | 199.9–223.9 | 207.1  | 188.6–224.0 | 11 | 0.413    |
| 10                        | 271.5   | 219.4–290.5 | 279.2  | 244.8–335.1 | 10 | 0.014    |
| 100                       | 250.8   | 225.1–289.4 | 376.0  | 259.2–412.6 | 10 | 0.084    |

**Supplementary Table S9.** Effects of (45 minutes) on the HCN activation time constant  $\tau_{\text{slow}}$  at different concentration groups (absolute values). Wilcoxon-matched pairs signed rank test for statistical comparisons.

| DEX [μM] | τ <sub>slow</sub> [ms] |            |        |            | n  | p     |
|----------|------------------------|------------|--------|------------|----|-------|
|          | control                |            | DEX    |            |    |       |
|          | Median                 | IQR        | Median | IQR        |    |       |
| 1        | 1088                   | 984.4–1329 | 1089   | 881.8–1190 | 11 | 0.765 |
| 10       | 1248                   | 938.9–1482 | 1295   | 1041–1962  | 10 | 0.322 |
| 100      | 1227                   | 1029–1608  | 941.8  | 735.4–1423 | 10 | 0.232 |

**Supplementary Table S10.** Effects of dexmedetomidine (45 minutes) on the voltage sag amplitude at different concentration groups (absolute values). Wilcoxon-matched pairs signed rank test for statistical comparisons.

| DEX [μM] | voltage sag amplitude [mV] |             |        |             | n  | p     |
|----------|----------------------------|-------------|--------|-------------|----|-------|
|          | control                    |             | DEX    |             |    |       |
|          | Median                     | IQR         | Median | IQR         |    |       |
| 1        | 85.07                      | 71.68–89.16 | 84.90  | 74.20–87.41 | 11 | 0.577 |
| 10       | 91.29                      | 78.67–96.41 | 87.33  | 80.76–95.77 | 10 | 0.492 |
| 100      | 71.22                      | 65.70–90.50 | 85.72  | 68.19–93.15 | 10 | 0.014 |

**Supplementary Table S11.** Effects of dexmedetomidine (45 minutes) on the rebound burst delay at different concentration groups (absolute values). Wilcoxon-matched pairs signed rank test for statistical comparisons.

| DEX [ $\mu$ M] | rebound burst delay [ms] |           |        |           | n  | <i>p</i> |
|----------------|--------------------------|-----------|--------|-----------|----|----------|
|                | control                  |           | DEX    |           |    |          |
|                | Median                   | IQR       | Median | IQR       |    |          |
| 1              | 29.0                     | 27.0–30.5 | 29.5   | 26.5–32.0 | 11 | 0.419    |
| 10             | 28.1                     | 24.9–29.8 | 29.0   | 25.3–33.1 | 10 | 0.719    |
| 100            | 30.4                     | 27.9–31.9 | 36.5   | 35.4–39.5 | 10 | 0.006    |

**Supplementary Table S12.** Effects of dexmedetomidine (45 minutes) on the number of action potentials during rebound at different concentration groups (absolute values). Wilcoxon-matched pairs signed rank test for statistical comparisons.

| DEX [ $\mu$ M] | number of action potentials (n) |          |        |          | n  | <i>p</i> |
|----------------|---------------------------------|----------|--------|----------|----|----------|
|                | control                         |          | DEX    |          |    |          |
|                | Median                          | IQR      | Median | IQR      |    |          |
| 1              | 7.8                             | 6.8–11.4 | 9.0    | 7.9–11.0 | 11 | 0.31     |
| 10             | 9.6                             | 5.3–17.6 | 7.9    | 5.8–17.3 | 10 | >0.999   |
| 100            | 10.5                            | 7.8–17.3 | 4.0    | 2.9–8.3  | 10 | 0.002    |

**Supplementary Table S13.** Effects of sevoflurane (45 minutes) on the rebound burst duration at different concentration groups (absolute values). Wilcoxon-matched pairs signed rank test for statistical comparisons.

| DEX [μM] | rebound burst duration [ms] |             |        |             | n  | p     |
|----------|-----------------------------|-------------|--------|-------------|----|-------|
|          | control                     |             | DEX    |             |    |       |
|          | Median                      | IQR         | Median | IQR         |    |       |
| 1        | 188.0                       | 117.0–389.5 | 251.5  | 149.0–322.5 | 11 | 0.206 |
| 10       | 257.0                       | 118.6–572.9 | 259.0  | 159.8–625.3 | 10 | 0.557 |
| 100      | 252.5                       | 129.9–679.8 | 50.75  | 36.0–337.5  | 10 | 0.020 |
